# Supplementary material
Source: publisher figshare collection journal article supplement (https://acs.figshare.com/ndownloader/files/4035997)
Supplement: Supplementary file 1 [file 4035997]

## Supporting Information

### Complexes with Redox-Active Ligands: Synthesis, Structure, Electrochemical and Photophysical Behavior of Ru(II) Complex with TTF-Annulated Phenanthroline

Lawrence K. Keniley Jr.,<sup>†</sup> Nathalie Dupont,<sup>‡</sup> Lipika Ray,<sup>†</sup> Jie Ding,<sup>‡</sup> Kirill Kovnir,<sup>†,§</sup> Jordan M. Hoyt,<sup>†,#</sup> Andreas Hauser,<sup>\*,‡</sup> Michael Shatruk<sup>\*,†</sup>

<sup>†</sup>*Department of Chemistry and Biochemistry, Florida State University, 95 Chieftan Way, Tallahassee, FL 32306, USA*

<sup>‡</sup>*Department of Physical Chemistry, University of Geneva, 30 quai Ernest-Ansermet, CH-1211 Geneva 4, Switzerland*

<sup>§</sup> *Present address: Department of Chemistry, University of California at Davis, Davis, CA 95616, USA*

<sup>#</sup> *Present address: Department of Chemistry, Princeton University, Princeton, NJ 08544, USA*

E-mail: [shatruk@chem.fsu.edu](mailto:shatruk@chem.fsu.edu), [andreas.hauser@unige.ch](mailto:andreas.hauser@unige.ch)

|                                                                                                       |    |
|-------------------------------------------------------------------------------------------------------|----|
| Figure S1. <sup>1</sup> H and 2D COSY NMR spectra of <b>1</b> , <b>2</b> , and <b>3</b> .....         | S2 |
| Figure S2. The proximity of the $\alpha$ -protons to the $\pi$ -system of bpy.....                    | S5 |
| Figure S3. Crystal packing of <b>L1</b> .....                                                         | S5 |
| Figure S4. Emission spectra of complexes <b>1-3</b> .....                                             | S6 |
| Figure S5. Kinetic profile of the difference absorbance spectrum of <b>1</b> .....                    | S7 |
| Figure S6. Absorption and emission spectra of a control CH <sub>3</sub> CN solution of <b>1</b> ..... | S7 |

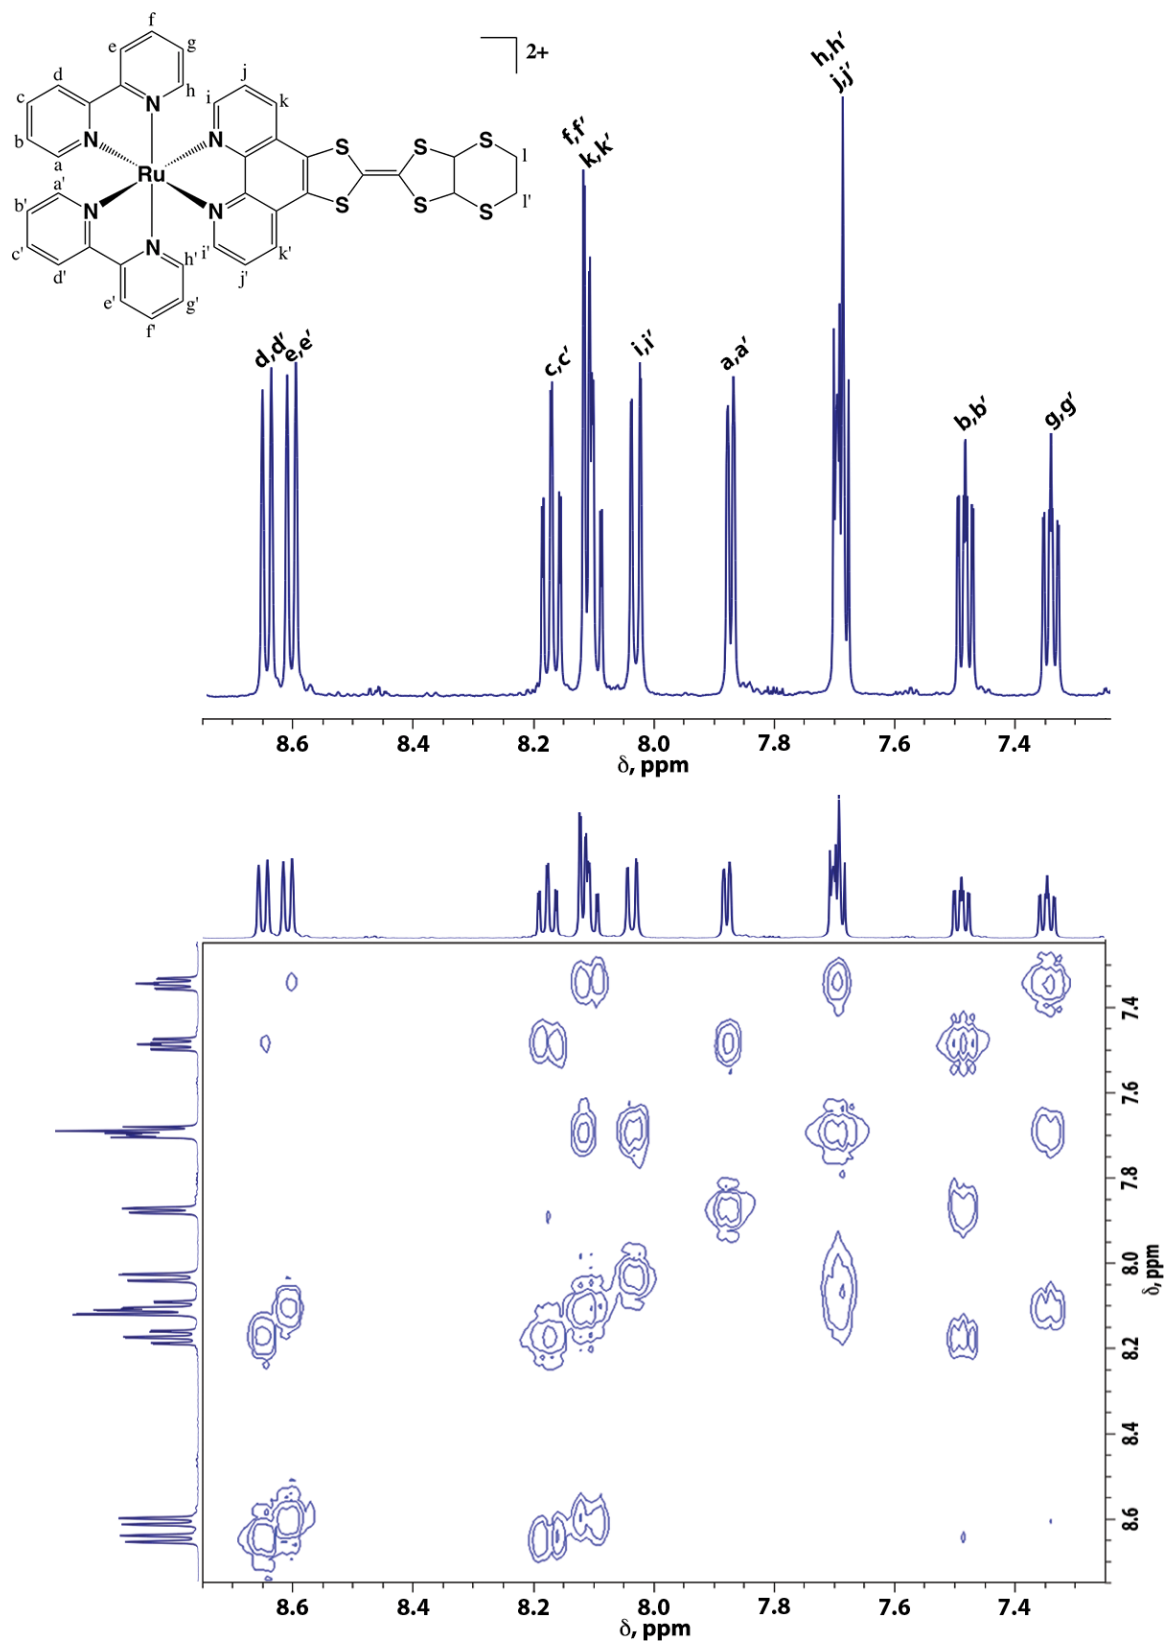

**Figure S1.**  $^1\text{H}$  and 2D COSY NMR spectra of **1**, **2**, and **3** in  $\text{CDCl}_3$  at room temperature.

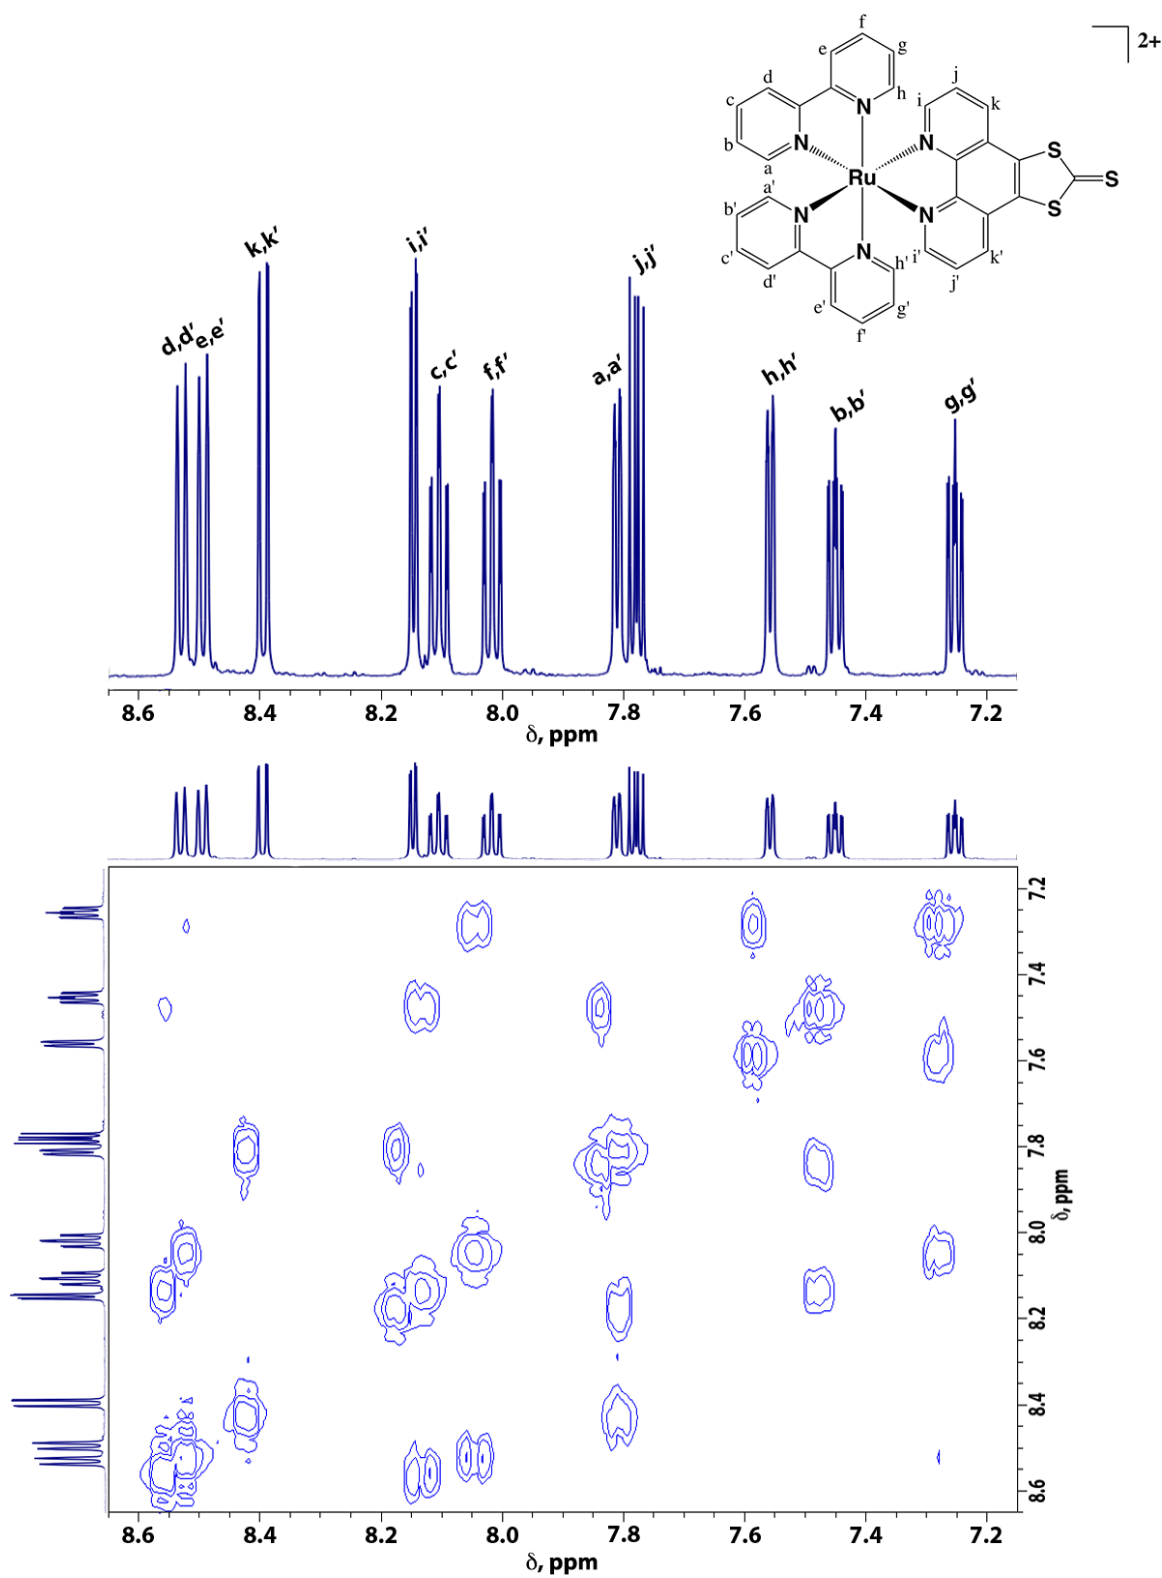

**Figure S1 (continued).**  $^1\text{H}$  and 2D COSY NMR spectra of **1**, **2**, and **3** in  $\text{CDCl}_3$  at room temperature.

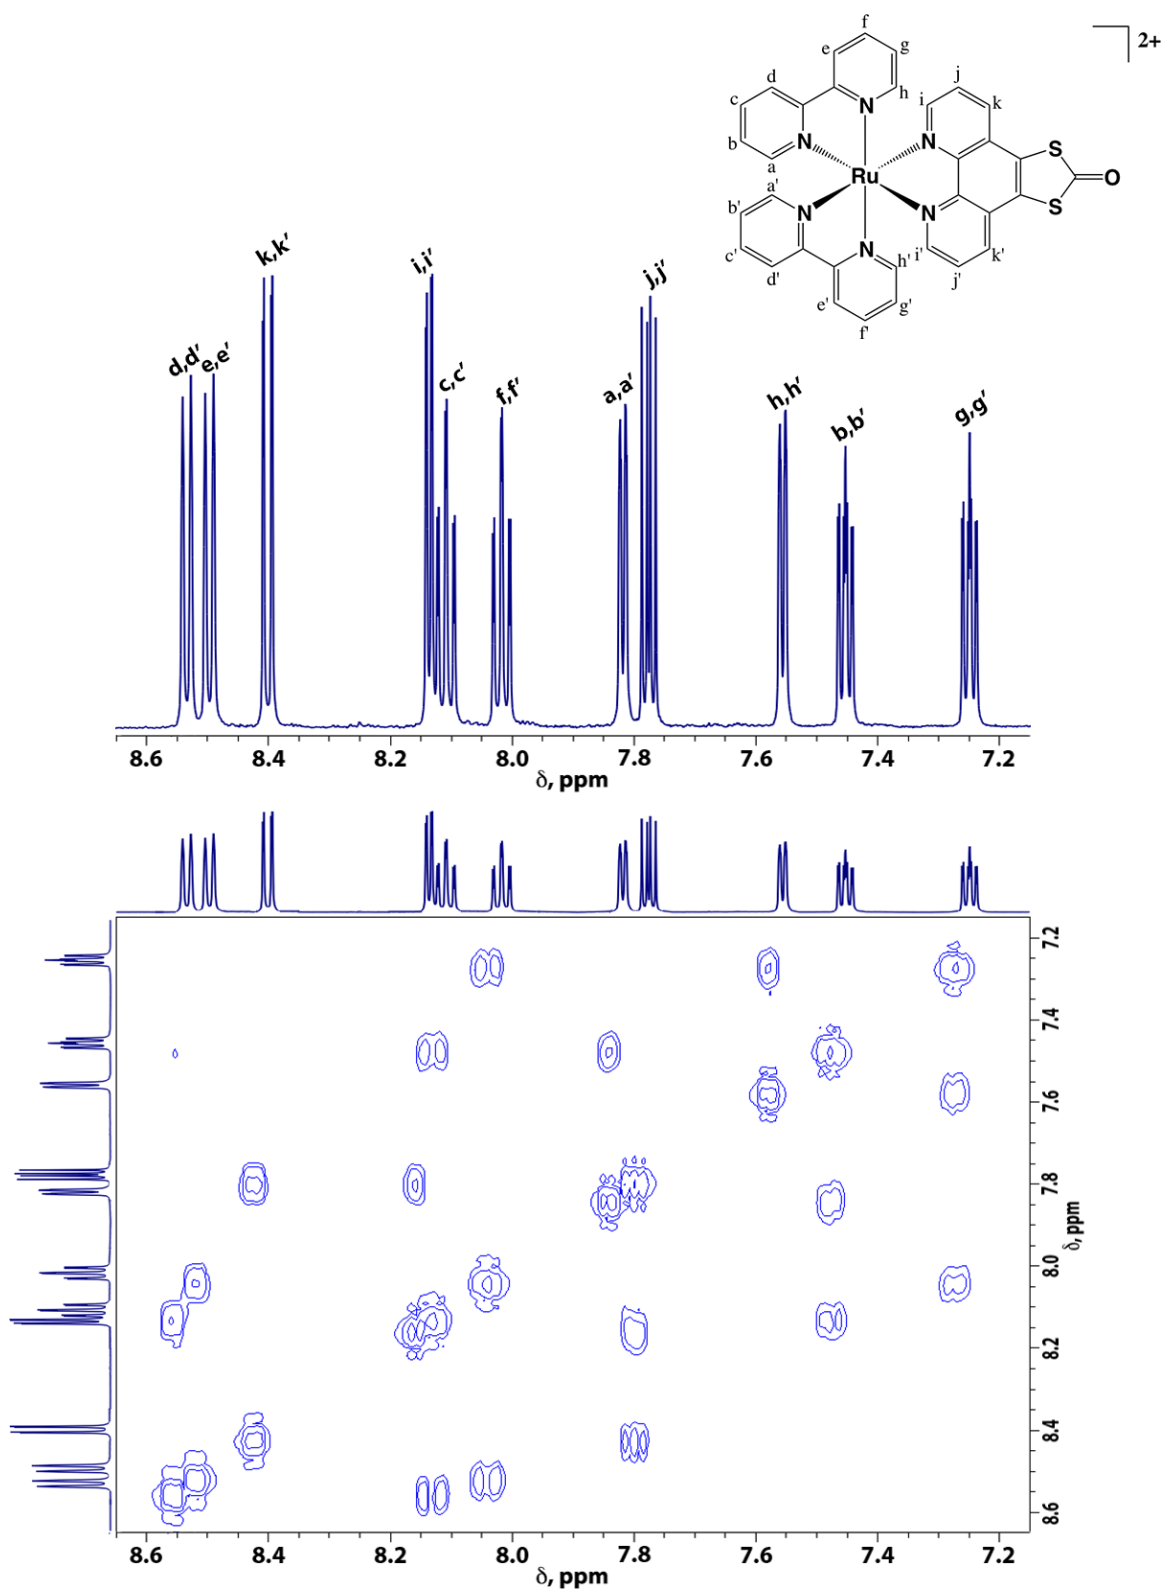

**Figure S1 (continued).**  $^1\text{H}$  and 2D COSY NMR spectra of **1**, **2**, and **3** in  $\text{CDCl}_3$  at room temperature.

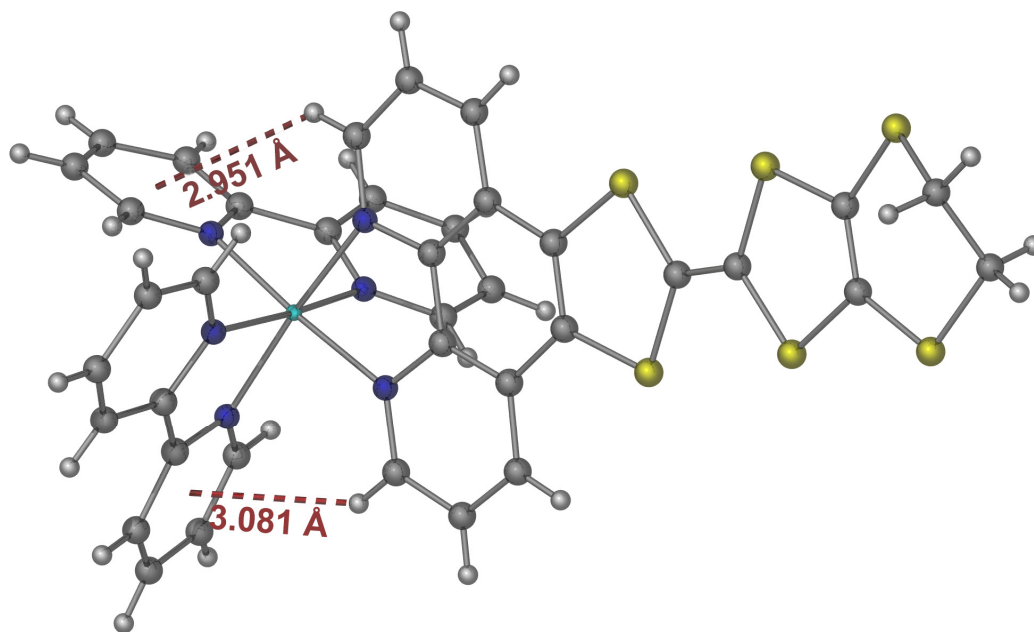

**Figure S2.** Molecular structure of [Ru(bpy)<sub>2</sub>(L1)]<sup>2+</sup> showing the proximity of the α-protons of coordinated L1 to the π-system of bpy ligands.

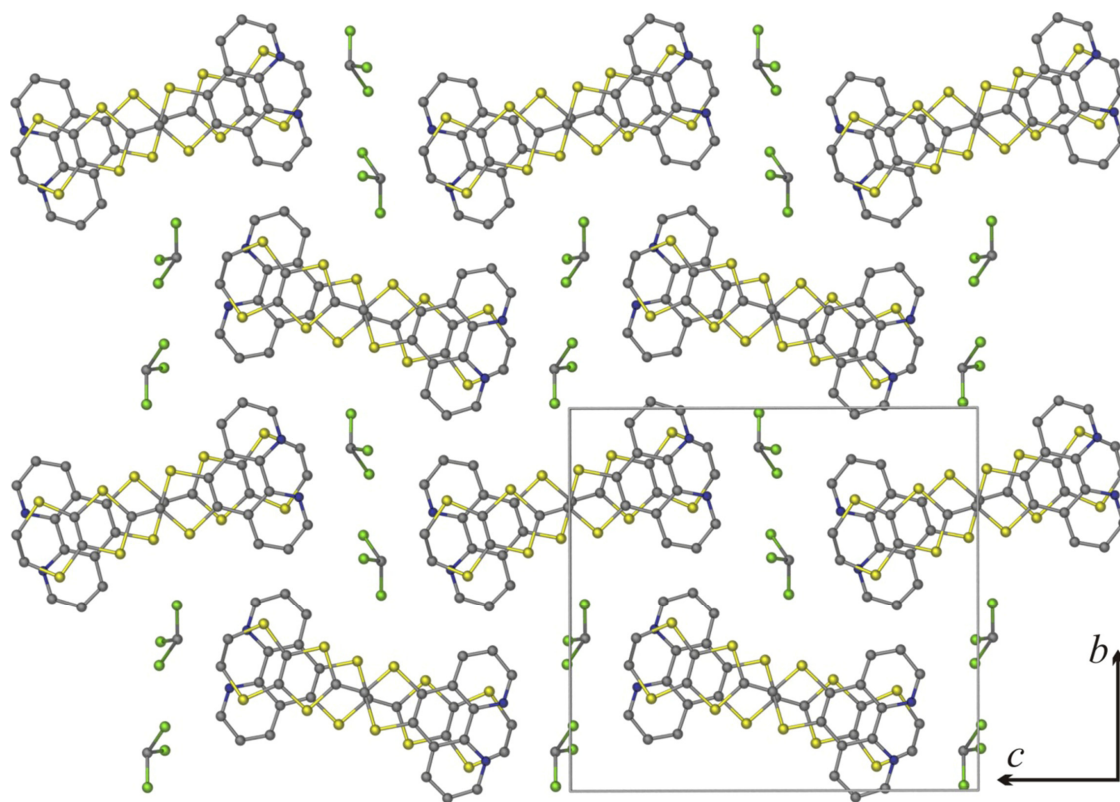

**Figure S3.** Crystal packing of L1 illustrating the columns of molecules stacked in a head-to-tail fashion. The columns run parallel to the *a* axis. H atoms are omitted for clarity.

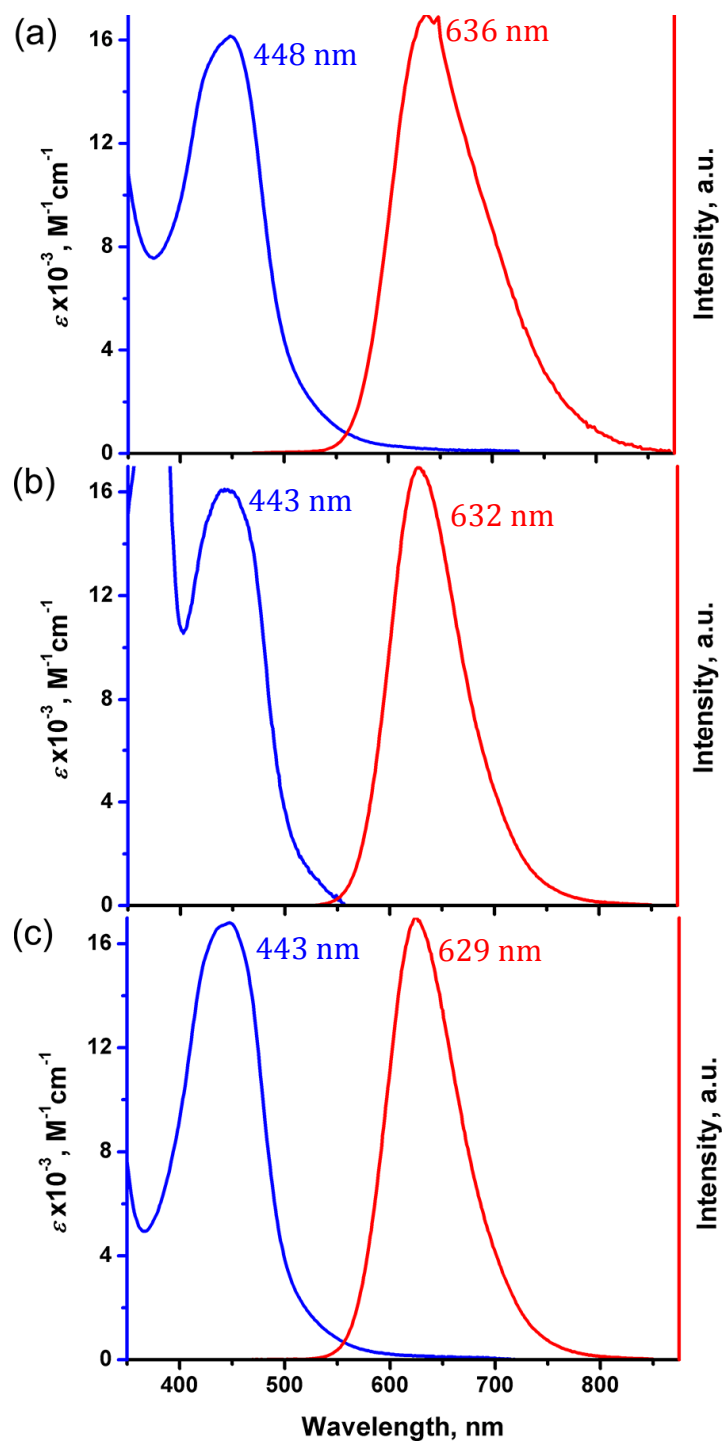

**Figure S4.** MLCT absorption bands and corresponding emission spectra of complexes **1-3** (a-c, respectively). The wavelengths of the absorption ( $\lambda_{\text{abs}}$ ) and emission ( $\lambda_{\text{em}}$ ) maxima are indicated.

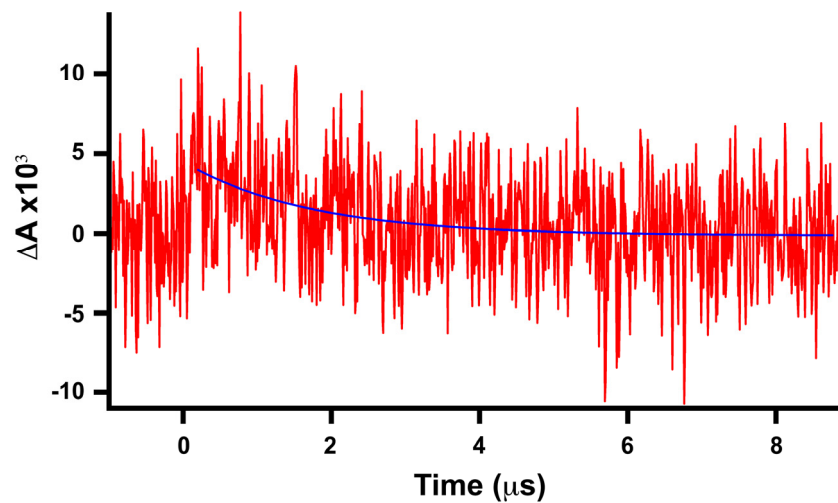

**Figure S5.** Kinetic profile of the difference absorbance spectrum of **1** in CH<sub>3</sub>CN at room temperature.  $\lambda_{\text{pump}}=488$  nm;  $\lambda_{\text{probe}}=370$  nm. Red – experimental data; blue – single-exponential global fit.

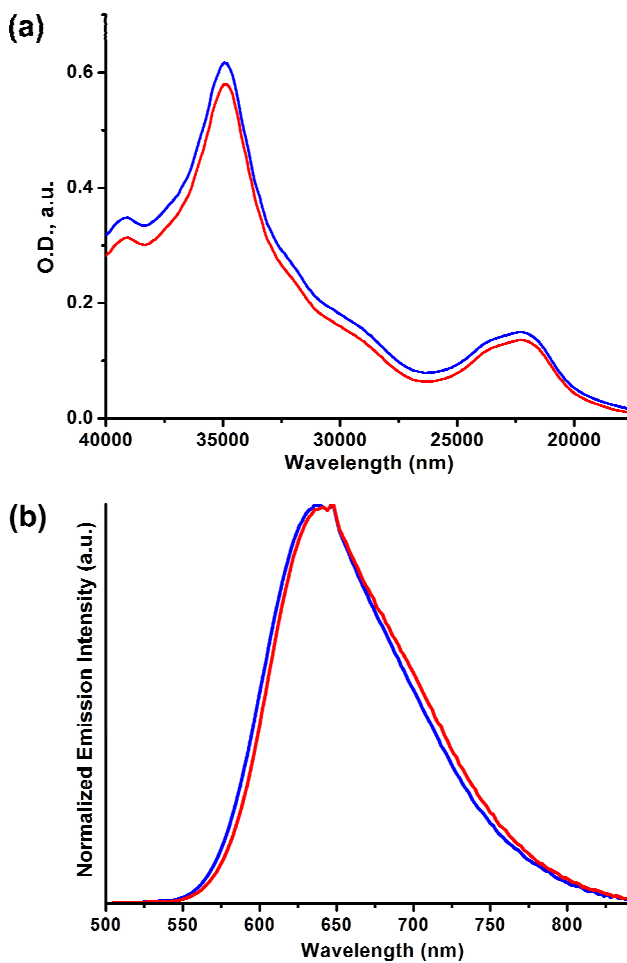

**Figure S6.** Absorption (a) and emission (b) spectra of **1** recorded on a solution prepared with freshly degassed CH<sub>3</sub>CN (red) and on the same solution after keeping it in the dark for 4 hours (blue). Note that there is almost no difference between the absorption and emission bands of the two samples.
